# Supplementary material for: Genetic mapping of the LOBED LEAF 1 (ClLL1) gene to a 127.6-kb region in watermelon (Citrullus lanatus L.)
Source: PLoS One. 2017 Jul 13;12(7):e0180741. doi: 10.1371/journal.pone.0180741 (PMC5509165; doi:10.1371/journal.pone.0180741)
Supplement: S3 Table — (XLS) [file pone.0180741.s003.xls]

## Sheet: S3 Table  
	S3 Table: Detailed information of differentially expressed genes
	Gene ID	FDR	Lobed_FPKM	Unlobed_FPKM	Log2(FC)	Up- or Down- Regulated	Nr_annotation	GO Component	GO Function	GO Process	KEGG_A_class	KEGG_B_class	Pathway
	Cla014193	0.0209322	0.001	2.27	11.1485	Up	Homeobox-leucine zipper protein (AHRD V1 *-*- Q9FXN8_ZINEL); contains Interpro domain(s) IPR001356 Homeobox	-	GO:0097159//organic cyclic compound binding;GO:0003677//DNA binding;GO:0003676//nucleic acid binding;GO:1901363//heterocyclic compound binding;GO:0005488//binding	-	-	-	-
	Cla019653	0.0123478	0.001	1.73	10.7566	Up	Rho termination factor (AHRD V1 *--* F4JRN0_ARATH); contains Interpro domain(s) IPR011112 Rho termination factor, N-terminal	-	-	-	-	-	-
	Cla018565	0.0353135	0.001	1.16	10.1799	Up	PHD-finger family protein expressed (AHRD V1 *-*- Q2QSD0_ORYSJ)	-	-	-	-	-	-
	Cla017465	0.0209322	0.001	0.94	9.87652	Up	Serine carboxypeptidase (AHRD V1 ***- E5GBX9_CUCME); contains Interpro domain(s) IPR001563 Peptidase S10, serine carboxypeptidase	-	-	-	-	-	-
	Cla012780	0.0209322	0.001	0.45	8.81378	Up	Phenylalanine ammonia-lyase (AHRD V1 ***- B9S0K2_RICCO); contains Interpro domain(s) IPR005922 Phenylalanine ammonia-lyase	GO:0005623//cell;GO:0044424//intracellular part;GO:0044464//cell part;GO:0044444//cytoplasmic part;GO:0005737//cytoplasm;GO:0005622//intracellular	GO:0016829//lyase activity;GO:0016841//ammonia-lyase activity;GO:0016840//carbon-nitrogen lyase activity;GO:0003824//catalytic activity	GO:1901605//alpha-amino acid metabolic process;GO:0009414//response to water deprivation;GO:0009411//response to UV;GO:0009628//response to abiotic stimulus;GO:0050896//response to stimulus;GO:0009058//biosynthetic process;GO:0009314//response to radiation;GO:0019752//carboxylic acid metabolic process;GO:0009699//phenylpropanoid biosynthetic process;GO:0044237//cellular metabolic process;GO:00717…	Metabolism	Amino acid metabolism;Biosynthesis of other secondary metabolites	ko00940//Phenylpropanoid biosynthesis;ko00360//Phenylalanine metabolism
	Cla007811	0.00233899	0.001	0.21	7.71425	Up	Callose synthase 5 (AHRD V1 ***- C8C9X3_ARATH); contains Interpro domain(s) IPR003440 Glycosyl transferase, family 48	GO:0044425//membrane part;GO:0005623//cell;GO:0044464//cell part;GO:0044459//plasma membrane part;GO:0005886//plasma membrane;GO:0071944//cell periphery;GO:0016020//membrane	GO:0016757//transferase activity, transferring glycosyl groups;GO:0046527//glucosyltransferase activity;GO:0008194//UDP-glycosyltransferase activity;GO:0016740//transferase activity;GO:0016758//transferase activity, transferring hexosyl groups;GO:0035251//UDP-glucosyltransferase activity;GO:0003824//catalytic activity	GO:0009856//pollination;GO:0009555//pollen development;GO:0008152//metabolic process;GO:0071704//organic substance metabolic process;GO:0010769//regulation of cell morphogenesis involved in differentiation;GO:0009987//cellular process;GO:0051704//multi-organism process;GO:0006074//(1->3)-beta-D-glucan metabolic process;GO:0050789//regulation of biological process;GO:0044707//single-multicellular …	-	-	-
	Cla005257	3.80681e-25	0.12	4.93	5.36048	Up	Wall-associated receptor kinase-like 22 (AHRD V1 *-** WAKLI_ARATH); contains Interpro domain(s) IPR002290 Serine/threonine protein kinase	-	GO:0016740//transferase activity;GO:0003824//catalytic activity;GO:0016772//transferase activity, transferring phosphorus-containing groups;GO:0016301//kinase activity	GO:0016310//phosphorylation;GO:0044260//cellular macromolecule metabolic process;GO:0050896//response to stimulus;GO:0044237//cellular metabolic process;GO:0006793//phosphorus metabolic process;GO:0006464//cellular protein modification process;GO:0006796//phosphate-containing compound metabolic process;GO:0008152//metabolic process;GO:0019538//protein metabolic process;GO:0009987//cellular proces…	-	-	-
	Cla004299	0.000540933	0.72	15.25	4.40467	Up	Leucine-rich repeat receptor-like tyrosine-protein kinase At2g41820 (AHRD V1 **-- Y2182_ARATH); contains Interpro domain(s) IPR001611 Leucine-rich repeat	-	-	-	-	-	-
	Cla020027	0.00159194	0.39	7.32	4.2303	Up	Ubiquitin-like protein (AHRD V1 *-*- Q8VWY0_CUCSA); contains Interpro domain(s) IPR000626 Ubiquitin	GO:0043227//membrane-bounded organelle;GO:0043229//intracellular organelle;GO:0044464//cell part;GO:0005623//cell;GO:0043231//intracellular membrane-bounded organelle;GO:0044424//intracellular part;GO:0043226//organelle;GO:0005622//intracellular	-	-	Genetic Information Processing	Folding, sorting and degradation	ko04120//Ubiquitin mediated proteolysis
	Cla009548	0.0123541	0.34	5.17	3.92656	Up	Unknown Protein (AHRD V1)	-	-	-	-	-	-
	Cla017606	0.0014222	2.24	25.24	3.49414	Up	Ubiquitin carboxyl-terminal hydrolase (AHRD V1 ***- F6HAA6_VITVI)	-	-	-	-	-	-
	Cla021971	2.98735e-05	0.19	2.03	3.41741	Up	Asparagine synthetase (AHRD V1 **** F6KDH5_MORAL); contains Interpro domain(s) IPR001962 Asparagine synthase	-	GO:0036094//small molecule binding;GO:0032550//purine ribonucleoside binding;GO:1901363//heterocyclic compound binding;GO:0001882//nucleoside binding;GO:0005488//binding;GO:0001883//purine nucleoside binding;GO:0003824//catalytic activity;GO:0097367//carbohydrate derivative binding;GO:0097159//organic cyclic compound binding;GO:0016879//ligase activity, forming carbon-nitrogen bonds;GO:0016874//l…	GO:0009746//response to hexose;GO:0034641//cellular nitrogen compound metabolic process;GO:0009743//response to carbohydrate;GO:0031669//cellular response to nutrient levels;GO:0009987//cellular process;GO:0009267//cellular response to starvation;GO:0044237//cellular metabolic process;GO:0043604//amide biosynthetic process;GO:0031668//cellular response to extracellular stimulus;GO:0008152//metabo…	Metabolism	Amino acid metabolism	ko00250//Alanine, aspartate and glutamate metabolism
	Cla002330	0.00233047	0.47	4.91	3.38499	Up	Ethylene-responsive transcription factor 1 (AHRD V1 *-** ERF1_ORYSJ); contains Interpro domain(s) IPR001471 Pathogenesis-related transcriptional factor and ERF, DNA-binding	-	-	-	-	-	-
	Cla019133	0.00233047	0.12	1.23	3.35755	Up	Nitrate transporter (AHRD V1 **-- E0X1U8_PONTR); contains Interpro domain(s) IPR000109 TGF-beta receptor, type I/II extracellular region	-	-	-	-	-	-
	Cla022868	0.0155486	0.56	4.87	3.12042	Up	Cytochrome c oxidase subunit 6b (AHRD V1 ***- Q9FE02_ORYSJ); contains Interpro domain(s) IPR003213 Cytochrome c oxidase, subunit VIb	GO:0043231//intracellular membrane-bounded organelle;GO:0043226//organelle;GO:0044464//cell part;GO:0043229//intracellular organelle;GO:0005622//intracellular;GO:0005623//cell;GO:0043227//membrane-bounded organelle;GO:0044424//intracellular part	GO:0009055//electron carrier activity	GO:0044699//single-organism process;GO:1902578//single-organism localization;GO:0051234//establishment of localization;GO:0015992//proton transport;GO:0006818//hydrogen transport;GO:0006811//ion transport;GO:0051179//localization;GO:0006812//cation transport;GO:0044765//single-organism transport;GO:0006810//transport;GO:0015672//monovalent inorganic cation transport	Metabolism	Energy metabolism	ko00190//Oxidative phosphorylation
	NewGene_015188	0.00111646	0.25	2.06	3.04264	Up	-	-	-	-	-	-	-
	Cla021000	0.0372477	2.17	17.07	2.9757	Up	Unknown Protein (AHRD V1)	-	-	-	-	-	-
	Cla018185	0.0028635	0.14	1.08	2.94753	Up	Receptor-like protein kinase At3g21340 (AHRD V1 *-** RLK6_ARATH); contains Interpro domain(s) IPR002290 Serine/threonine protein kinase	-	-	-	-	-	-
	Cla014924	1.43549e-09	2.05	14.17	2.78914	Up	S-ribonuclease (Fragment) (AHRD V1 **** A8R5I2_PRUMU); contains Interpro domain(s) IPR001568 Ribonuclease T2	-	-	-	-	-	-
	Cla015512	0.0111676	1.29	8.54	2.72687	Up	Mediator of aba-regulated dormancy 1 (AHRD V1 *--- D7LTE7_ARALL); contains Interpro domain(s) IPR007650 Protein of unknown function DUF581	-	-	-	-	-	-
	Cla019262	0.0258583	5.3	31.98	2.59311	Up	Brain protein 44-like protein (AHRD V1 ***- B6UEL2_MAIZE); contains Interpro domain(s) IPR005336 Uncharacterised protein family UPF0041	-	-	-	-	-	-
	NewGene_019058	0.00492833	0.73	4.37	2.58166	Up	-	-	-	-	-	-	-
	Cla017363	0.0258583	0.62	3.63	2.54963	Up	Zinc finger family protein (AHRD V1 **-* D7LR15_ARALL); contains Interpro domain(s) IPR018957 Zinc finger, C3HC4 RING-type	-	-	-	-	-	-
	Cla014121	0.0258583	0.2	1.14	2.51096	Up	Multidrug resistance protein mdtK (AHRD V1 **-- MDTK_YERE8); contains Interpro domain(s) IPR002528 Multi antimicrobial extrusion protein MatE	GO:0044425//membrane part;GO:0016020//membrane;GO:0031224//intrinsic component of membrane	GO:0015291//secondary active transmembrane transporter activity;GO:0005215//transporter activity;GO:0022804//active transmembrane transporter activity;GO:0022857//transmembrane transporter activity	GO:0042493//response to drug;GO:0009987//cellular process;GO:0015893//drug transport;GO:0050896//response to stimulus;GO:0042221//response to chemical;GO:0044765//single-organism transport;GO:0044763//single-organism cellular process;GO:0051179//localization;GO:1902578//single-organism localization;GO:0006810//transport;GO:0044699//single-organism process;GO:0051234//establishment of localization	-	-	-
	NewGene_015270	0.0116983	0.47	2.57	2.45104	Up	-	-	-	-	-	-	-
	Cla004813	1.36236e-16	1.59	8.41	2.40308	Up	Beta-glucosidase G2 (AHRD V1 ***- A8TVQ5_MEDTR); contains Interpro domain(s) IPR001360 Glycoside hydrolase, family 1	-	GO:0004553//hydrolase activity, hydrolyzing O-glycosyl compounds;GO:0016787//hydrolase activity;GO:0016798//hydrolase activity, acting on glycosyl bonds;GO:0003824//catalytic activity	GO:0044237//cellular metabolic process;GO:0051704//multi-organism process;GO:0043207//response to external biotic stimulus;GO:0006082//organic acid metabolic process;GO:0009987//cellular process;GO:0008152//metabolic process;GO:0009617//response to bacterium;GO:0044699//single-organism process;GO:0042742//defense response to bacterium;GO:1901657//glycosyl compound metabolic process;GO:0050896//re…	Metabolism	Metabolism of other amino acids;Carbohydrate metabolism;Biosynthesis of other secondary metabolites	ko00500//Starch and sucrose metabolism;ko00940//Phenylpropanoid biosynthesis;ko00460//Cyanoamino acid metabolism
	Cla018180	0.00781162	0.65	3.26	2.32636	Up	Cysteine/histidine-rich C1 domain-containing protein (AHRD V1 *-*- F4IRV7_ARATH); contains Interpro domain(s) IPR011424 C1-like	-	-	-	-	-	-
	Cla015870	0.0117191	11	54.78	2.31615	Up	Auxin-induced SAUR-like protein (AHRD V1 ***- Q8S349_CAPAN); contains Interpro domain(s) IPR003676 Auxin responsive SAUR protein	-	-	-	Environmental Information Processing	Signal transduction	ko04075//Plant hormone signal transduction
	Cla009049	0.0383847	1.23	5.67	2.20469	Up	CASP-like protein POPTRDRAFT_575900 (AHRD V1 ***- CSPLJ_POPTR); contains Interpro domain(s) IPR006702 Uncharacterised protein family UPF0497, trans-membrane plant	-	-	-	-	-	-
	Cla018888	0.0006347	0.76	3.4	2.16146	Up	HKT1 (Fragment) (AHRD V1 ***- A0PIE8_ORYRU); contains Interpro domain(s) IPR003445 Cation transporter	-	-	-	-	-	-
	Cla016299	0.0114126	0.97	4.23	2.1246	Up	Carboxyl methyltransferase (AHRD V1 **** Q70T29_BIXOR); contains Interpro domain(s) IPR005299 SAM dependent carboxyl methyltransferase	-	-	-	-	-	-
	Cla011258	0.00736273	0.41	1.73	2.07708	Up	Multidrug resistance protein mdtK (AHRD V1 ***- MDTK_ERWAM); contains Interpro domain(s) IPR002528 Multi antimicrobial extrusion protein MatE	GO:0044425//membrane part;GO:0016020//membrane;GO:0031224//intrinsic component of membrane	GO:0005215//transporter activity;GO:0022804//active transmembrane transporter activity;GO:0022857//transmembrane transporter activity;GO:0015291//secondary active transmembrane transporter activity	GO:0009987//cellular process;GO:0006950//response to stress;GO:0051234//establishment of localization;GO:1902578//single-organism localization;GO:0006952//defense response;GO:0006810//transport;GO:0044763//single-organism cellular process;GO:0051179//localization;GO:0044699//single-organism process;GO:0042221//response to chemical;GO:0042493//response to drug;GO:0044765//single-organism transport…	-	-	-
	NewGene_020052	0.0108221	0.3	1.22	2.02385	Up	-	-	-	-	-	-	-
	Cla011828	0.0156124	0.52	2.03	1.9649	Up	Core-2/I-branching beta-1 6-N-acetylglucosaminyltransferase family protein (AHRD V1 **-- Q1G300_ARATH); contains Interpro domain(s) IPR004949 Protein of unknown function DUF266, plant	-	GO:0003824//catalytic activity;GO:0016757//transferase activity, transferring glycosyl groups;GO:0008194//UDP-glycosyltransferase activity;GO:0016740//transferase activity	-	-	-	-
	Cla008421	0.0204731	14.75	54.22	1.87811	Up	Cysteine proteinase inhibitor 4 (AHRD V1 -**- CYT4_ARATH); contains Interpro domain(s) IPR002885 Pentatricopeptide repeat	-	-	-	-	-	-
	Cla022313	0.0482837	0.39	1.43	1.87447	Up	Fgenesh protein 60 (AHRD V1 ***- Q1ZY19_BETVU); contains Interpro domain(s) IPR004158 Protein of unknown function DUF247, plant	-	-	-	-	-	-
	Cla010096	1.04632e-40	15.53	56.79	1.87058	Up	Xyloglucan endotransglucosylase/hydrolase 2 (AHRD V1 ***- D5HP44_9ROSA); contains Interpro domain(s) IPR016455 Xyloglucan endotransglucosylase/hydrolase	GO:0005576//extracellular region;GO:0016021//integral component of membrane;GO:0016020//membrane;GO:0005623//cell;GO:0044464//cell part;GO:0044425//membrane part;GO:0031224//intrinsic component of membrane;GO:0071944//cell periphery;GO:0030312//external encapsulating structure	GO:0016758//transferase activity, transferring hexosyl groups;GO:0016757//transferase activity, transferring glycosyl groups;GO:0016740//transferase activity;GO:0016798//hydrolase activity, acting on glycosyl bonds;GO:0016787//hydrolase activity;GO:0003824//catalytic activity	GO:0009827//plant-type cell wall modification;GO:0071554//cell wall organization or biogenesis;GO:0071555//cell wall organization;GO:0071840//cellular component organization or biogenesis;GO:0044238//primary metabolic process;GO:0008152//metabolic process;GO:0045229//external encapsulating structure organization;GO:0016043//cellular component organization;GO:0009987//cellular process;GO:0043170//…	-	-	-
	Cla014824	0.0047514	0.98	3.55	1.85697	Up	1-aminocyclopropane-1-carboxylate oxidase 5 (AHRD V1 **-- ACCO5_ARATH); contains Interpro domain(s) IPR005123 Oxoglutarate and iron-dependent oxygenase	-	GO:0003824//catalytic activity;GO:0016705//oxidoreductase activity, acting on paired donors, with incorporation or reduction of molecular oxygen;GO:0016491//oxidoreductase activity	-	-	-	-
	Cla008924	0.0221193	7.35	26.51	1.85072	Up	Unknown Protein (AHRD V1)	GO:0016020//membrane	GO:0016671//oxidoreductase activity, acting on a sulfur group of donors, disulfide as acceptor;GO:0003824//catalytic activity;GO:0016667//oxidoreductase activity, acting on a sulfur group of donors;GO:0016491//oxidoreductase activity	GO:0044699//single-organism process;GO:0044710//single-organism metabolic process;GO:0008152//metabolic process	-	-	-
	Cla015588	0.03138	0.47	1.68	1.83773	Up	Cytochrome p450 (AHRD V1 ***- E5GCA5_CUCME); contains Interpro domain(s) IPR001128 Cytochrome P450	-	-	-	Metabolism	Metabolism of terpenoids and polyketides	ko00905//Brassinosteroid biosynthesis
	NewGene_018819	0.03138	0.4	1.42	1.82782	Up	-	-	-	-	-	-	-
	Cla022975	0.0439031	2.16	7.34	1.76475	Up	Caffeoyl-CoA O-methyltransferase (AHRD V1 **** F4IAT5_ARATH); contains Interpro domain(s) IPR002935 O-methyltransferase, family 3	GO:0044424//intracellular part;GO:0044464//cell part;GO:0044444//cytoplasmic part;GO:0005737//cytoplasm;GO:0005622//intracellular;GO:0005623//cell	GO:0003824//catalytic activity;GO:0008171//O-methyltransferase activity;GO:0008168//methyltransferase activity;GO:0016740//transferase activity;GO:0016741//transferase activity, transferring one-carbon groups	GO:0043603//cellular amide metabolic process;GO:0043604//amide biosynthetic process;GO:0044237//cellular metabolic process;GO:0007275//multicellular organismal development;GO:0009987//cellular process;GO:0044249//cellular biosynthetic process;GO:0032502//developmental process;GO:0008152//metabolic process;GO:0044271//cellular nitrogen compound biosynthetic process;GO:0044707//single-multicellular…	Metabolism	Biosynthesis of other secondary metabolites;Amino acid metabolism	ko00940//Phenylpropanoid biosynthesis;ko00360//Phenylalanine metabolism;ko00941//Flavonoid biosynthesis;ko00945//Stilbenoid, diarylheptanoid and gingerol biosynthesis
	Cla014397	0.00641689	1.89	6.4	1.75969	Up	Unknown Protein (AHRD V1)	-	-	-	-	-	-
	Cla019485	2.24376e-20	3.95	13.36	1.758	Up	Polyphenol oxidase (AHRD V1 ***- E5Q8T0_ZIZJJ); contains Interpro domain(s) IPR016213 Polyphenol oxidase, plant	-	GO:0003824//catalytic activity;GO:0016491//oxidoreductase activity	GO:0044699//single-organism process;GO:0044710//single-organism metabolic process;GO:0008152//metabolic process	Metabolism	Amino acid metabolism;Biosynthesis of other secondary metabolites	ko00350//Tyrosine metabolism;ko00950//Isoquinoline alkaloid biosynthesis
	Cla006440	0.0397783	4.45	14.85	1.73859	Up	Myb-like DNA binding domain containing protein (AHRD V1 **-* Q2QM89_ORYSJ); contains Interpro domain(s) IPR001005 SANT, DNA-binding	GO:0032991//macromolecular complex;GO:0044427//chromosomal part;GO:0043229//intracellular organelle;GO:0044464//cell part;GO:0044424//intracellular part;GO:0005622//intracellular;GO:0044446//intracellular organelle part;GO:0005694//chromosome;GO:0043228//non-membrane-bounded organelle;GO:0044422//organelle part;GO:0043226//organelle;GO:0043231//intracellular membrane-bounded organelle;GO:0000785/…	GO:0005488//binding;GO:0046983//protein dimerization activity;GO:0003676//nucleic acid binding;GO:1901363//heterocyclic compound binding;GO:0003690//double-stranded DNA binding;GO:0005515//protein binding;GO:0043566//structure-specific DNA binding;GO:0097159//organic cyclic compound binding;GO:0003677//DNA binding	GO:0009628//response to abiotic stimulus;GO:0009725//response to hormone;GO:0006996//organelle organization;GO:0042221//response to chemical;GO:0050896//response to stimulus;GO:0009719//response to endogenous stimulus;GO:0071824//protein-DNA complex subunit organization;GO:0016043//cellular component organization;GO:0010038//response to metal ion;GO:0010035//response to inorganic substance;GO:004…	-	-	-
	Cla022353	1.07044e-06	8.58	27.63	1.68719	Up	Ethylene-responsive transcription factor 3 (AHRD V1 *-** B6TFS2_MAIZE); contains Interpro domain(s) IPR001471 Pathogenesis-related transcriptional factor and ERF, DNA-binding	-	-	-	-	-	-
	Cla006235	0.00344084	0.86	2.73	1.66649	Up	3-ketoacyl-CoA synthase (AHRD V1 ***- B9R9L0_RICCO); contains Interpro domain(s) IPR012392 Very-long-chain 3-ketoacyl-CoA synthase	-	-	-	Metabolism	Lipid metabolism	ko00062//Fatty acid elongation
	Cla021799	0.00313817	2.48	7.74	1.64199	Up	Unknown Protein (AHRD V1)	-	-	-	-	-	-
	NewGene_009491	0.00772061	0.49	1.51	1.62369	Up	-	-	-	-	-	-	-
	Cla016928	0.0108783	4.98	15.15	1.6051	Up	Chromodomain-helicase-DNA-binding protein 1-like (AHRD V1 **-* CHD1L_DANRE); contains Interpro domain(s) IPR000330 SNF2-related	-	GO:0016817//hydrolase activity, acting on acid anhydrides;GO:0001883//purine nucleoside binding;GO:0003676//nucleic acid binding;GO:0016818//hydrolase activity, acting on acid anhydrides, in phosphorus-containing anhydrides;GO:0036094//small molecule binding;GO:0032549//ribonucleoside binding;GO:0097159//organic cyclic compound binding;GO:0097367//carbohydrate derivative binding;GO:0016462//pyrop…	-	-	-	-
	Cla014759	0.0285044	1.25	3.78	1.59646	Up	Protein FANTASTIC FOUR 3 (AHRD V1 *-*- FAF3_ARATH)	-	-	-	-	-	-
	NewGene_016266	0.00727552	1.52	4.58	1.59128	Up	sieve element occlusion protein 1 [Cucurbita maxima]	-	-	-	-	-	-
	Cla018580	0.0285044	2.59	7.78	1.58682	Up	Lyr motif-containing protein 4a (AHRD V1 **-- E3TD00_9TELE); contains Interpro domain(s) IPR008011 Complex 1 LYR protein	-	-	-	-	-	-
	Cla020676	0.0285044	0.72	2.16	1.58496	Up	Alpha-amylase (AHRD V1 ***- Q9ZP43_PHAVU); contains Interpro domain(s) IPR013775 Alpha-amylase, plant	-	GO:0016787//hydrolase activity;GO:0043169//cation binding;GO:0004553//hydrolase activity, hydrolyzing O-glycosyl compounds;GO:0016798//hydrolase activity, acting on glycosyl bonds;GO:0043167//ion binding;GO:0003824//catalytic activity;GO:0005488//binding	GO:0050896//response to stimulus;GO:0042221//response to chemical;GO:0001101//response to acid chemical;GO:0008152//metabolic process	Metabolism	Carbohydrate metabolism	ko00500//Starch and sucrose metabolism
	Cla019603	0.0167884	1.66	4.94	1.57333	Up	Cytochrome B561-related protein (AHRD V1 **-- Q1H8M6_BETVU); contains Interpro domain(s) IPR006593 Cytochrome b561/ferric reductase transmembrane	GO:0005622//intracellular;GO:0005623//cell;GO:0031224//intrinsic component of membrane;GO:0044425//membrane part;GO:0044464//cell part;GO:0044424//intracellular part;GO:0016020//membrane	GO:0005488//binding;GO:0032549//ribonucleoside binding;GO:0017111//nucleoside-triphosphatase activity;GO:0016818//hydrolase activity, acting on acid anhydrides, in phosphorus-containing anhydrides;GO:0046872//metal ion binding;GO:0046914//transition metal ion binding;GO:0043167//ion binding;GO:0032550//purine ribonucleoside binding;GO:0097159//organic cyclic compound binding;GO:0001882//nucleosid…	GO:0019693//ribose phosphate metabolic process;GO:0009056//catabolic process;GO:0009117//nucleotide metabolic process;GO:0044281//small molecule metabolic process;GO:0019222//regulation of metabolic process;GO:0048518//positive regulation of biological process;GO:0065009//regulation of molecular function;GO:0050790//regulation of catalytic activity;GO:0019439//aromatic compound catabolic process;…	-	-	-
	Cla005574	5.57494e-27	171.68	509.6	1.56964	Up	Cysteine proteinase inhibitor (AHRD V1 **** Q30KW6_ZEAMP); contains Interpro domain(s) IPR000010 Proteinase inhibitor I25, cystatin	-	-	-	-	-	-
	Cla017333	0.0258583	1.23	3.61	1.55334	Up	GDSL esterase/lipase (AHRD V1 ***- F4HYK6_ARATH); contains Interpro domain(s) IPR001087 Lipase, GDSL	-	-	-	-	-	-
	Cla018189	2.88664e-06	2.09	6.04	1.53105	Up	Os03g0270500 protein (Fragment) (AHRD V1 *-*- Q0DT39_ORYSJ); contains Interpro domain(s) IPR007700 Protein of unknown function DUF668	-	-	-	-	-	-
	Cla011970	0.0356628	0.61	1.73	1.50389	Up	ATP-dependent DNA helicase mph1 (AHRD V1 *-*- E9EVX0_METAR); contains Interpro domain(s) IPR006935 Restriction endonuclease, type I, R subunit/Type III, Res subunit	-	-	-	-	-	-
	NewGene_012906	0.0356628	0.68	1.91	1.48997	Up	-	-	-	-	-	-	-
	Cla017931	0.0120235	0.5	1.4	1.48543	Up	B-lectin receptor kinase (AHRD V1 **** D7F606_ORYSI); contains Interpro domain(s) IPR002290 Serine/threonine protein kinase	-	-	-	-	-	-
	Cla017269	6.12049e-05	1.64	4.58	1.48165	Up	Mate efflux family protein (AHRD V1 ***- D7KHQ9_ARALL); contains Interpro domain(s) IPR002528 Multi antimicrobial extrusion protein MatE	-	-	-	-	-	-
	Cla010413	0.0486387	2.45	6.71	1.45353	Up	MYB transcription factor (AHRD V1 **** Q9SPG9_ARATH); contains Interpro domain(s) IPR015495 Myb transcription factor	-	-	-	-	-	-
	Cla016576	0.00385769	3.45	9.43	1.45066	Up	CM0216.380.nc protein (AHRD V1 *-*- B0BLI4_LOTJA)	-	-	-	-	-	-
	Cla011071	0.00126437	3.57	9.75	1.44948	Up	Harpin-induced protein-like (Fragment) (AHRD V1 **-- D2CFH8_COFAR); contains Interpro domain(s) IPR010847 Harpin-induced 1	-	-	-	-	-	-
	Cla001683	0.00727552	11.17	30.45	1.44681	Up	Coiled-coil domain-containing protein 132 (AHRD V1 **-- F1KU95_ASCSU); contains Interpro domain(s) IPR019514 Protein of unknown function DUF2451, C-terminal	-	-	-	-	-	-
	Cla011848	0.0431583	5.35	14.52	1.44043	Up	Unknown Protein (AHRD V1); contains Interpro domain(s) IPR006968 Protein of unknown function DUF647	-	-	-	-	-	-
	Cla013174	0.0383847	9.86	26.7	1.43718	Up	Pro-apoptotic serine protease nma111-like protein (AHRD V1 ***- D0NE02_PHYIT); contains Interpro domain(s) IPR009003 Peptidase, trypsin-like serine and cysteine	-	-	-	Metabolism	Amino acid metabolism	ko00330//Arginine and proline metabolism
	NewGene_009275	0.0383847	2.24	6.04	1.43105	Up	-	-	-	-	-	-	-
	Cla020067	0.00196912	1.81	4.86	1.42497	Up	Cytokinin oxidase/dehydrogenase (AHRD V1 ***- C3VPM6_SOLTU); contains Interpro domain(s) IPR006094 FAD linked oxidase, N-terminal	-	GO:0097159//organic cyclic compound binding;GO:0016645//oxidoreductase activity, acting on the CH-NH group of donors;GO:0003824//catalytic activity;GO:0016616//oxidoreductase activity, acting on the CH-OH group of donors, NAD or NADP as acceptor;GO:0016491//oxidoreductase activity;GO:0000166//nucleotide binding;GO:1901363//heterocyclic compound binding;GO:0005488//binding;GO:0016614//oxidoreducta…	GO:0006725//cellular aromatic compound metabolic process;GO:0006807//nitrogen compound metabolic process;GO:0044710//single-organism metabolic process;GO:0071704//organic substance metabolic process;GO:0065008//regulation of biological quality;GO:0009888//tissue development;GO:0065007//biological regulation;GO:0008152//metabolic process;GO:0009987//cellular process;GO:0034754//cellular hormone me…	Metabolism	Metabolism of terpenoids and polyketides	ko00908//Zeatin biosynthesis
	Cla021520	0.0431583	1.69	4.53	1.42249	Up	Myb-related transcription factor (AHRD V1 **-* A7ULI0_DATME); contains Interpro domain(s) IPR015495 Myb transcription factor	-	-	GO:0050896//response to stimulus	-	-	-
	Cla002878	0.0251379	1.54	4.12	1.41971	Up	Amino acid transporter family protein (AHRD V1 ***- D7LGK0_ARALL); contains Interpro domain(s) IPR013057 Amino acid transporter, transmembrane	-	-	-	-	-	-
	Cla014083	0.000296722	20.3	53.97	1.41068	Up	Hydroxyproline-rich glycoprotein (AHRD V1 ***- A9YWR1_MEDTR)	-	-	-	-	-	-
	Cla021226	0.0113285	4.86	12.88	1.4061	Up	Zinc finger family protein (AHRD V1 **-* D7MIW5_ARALL); contains Interpro domain(s) IPR018957 Zinc finger, C3HC4 RING-type	-	-	-	-	-	-
	Cla013947	0.0113285	3.61	9.53	1.40048	Up	General transcription factor IIH subunit 3 (AHRD V1 ***- TF2H3_HUMAN); contains Interpro domain(s) IPR004600 Transcription factor Tfb4	-	-	-	Genetic Information Processing	Replication and repair;Transcription	ko03420//Nucleotide excision repair;ko03022//Basal transcription factors
	Cla016925	0.0383847	0.93	2.43	1.38565	Up	BHLH transcription factor-like protein (AHRD V1 *-*- Q8L4Y9_ORYSJ); contains Interpro domain(s) IPR011598 Helix-loop-helix DNA-binding	GO:0044424//intracellular part;GO:0043231//intracellular membrane-bounded organelle;GO:0005623//cell;GO:0043226//organelle;GO:0044464//cell part;GO:0043227//membrane-bounded organelle;GO:0043229//intracellular organelle;GO:0005622//intracellular	-	-	-	-	-
	Cla005457	4.50993e-41	20.35	52.92	1.37878	Up	Cytochrome P450 (AHRD V1 ***- B9MVQ8_POPTR); contains Interpro domain(s) IPR001128 Cytochrome P450	-	GO:0046906//tetrapyrrole binding;GO:0046914//transition metal ion binding;GO:0043167//ion binding;GO:0016491//oxidoreductase activity;GO:0005488//binding;GO:0046872//metal ion binding;GO:0016709//oxidoreductase activity, acting on paired donors, with incorporation or reduction of molecular oxygen, NAD(P)H as one donor, and incorporation of one atom of oxygen;GO:0016705//oxidoreductase activity, a…	GO:0061458//reproductive system development;GO:0009791//post-embryonic development;GO:0006629//lipid metabolic process;GO:0044767//single-organism developmental process;GO:0006720//isoprenoid metabolic process;GO:0032504//multicellular organism reproduction;GO:0044763//single-organism cellular process;GO:0006950//response to stress;GO:0032502//developmental process;GO:0009607//response to biotic …	Metabolism	Metabolism of terpenoids and polyketides	ko00906//Carotenoid biosynthesis
	Cla007011	9.84764e-20	10.11	26.26	1.37708	Up	Pore-forming toxin-like protein Hfr-2 (AHRD V1 ***- Q4JEV5_WHEAT); contains Interpro domain(s) IPR008998 Agglutinin	-	-	-	-	-	-
	Cla001849	2.54924e-20	15.84	41.09	1.37521	Up	Peroxidase (AHRD V1 ***- Q43499_SOLLC); contains Interpro domain(s) IPR002016 Haem peroxidase, plant/fungal/bacterial	-	-	-	Metabolism	Biosynthesis of other secondary metabolites	ko00940//Phenylpropanoid biosynthesis
	Cla016138	0.00636415	0.93	2.4	1.36773	Up	Dynamin (AHRD V1 **-- E5GB64_CUCME); contains Interpro domain(s) IPR001401 Dynamin, GTPase region	-	-	-	-	-	-
	Cla010929	0.0297423	1.63	4.19	1.36208	Up	Ethylene responsive transcription factor 2a (AHRD V1 *-** C0J9I7_9ROSA); contains Interpro domain(s) IPR001471 Pathogenesis-related transcriptional factor and ERF, DNA-binding	-	-	-	-	-	-
	Cla021397	2.89028e-07	3.55	9.01	1.34371	Up	Adenosylhomocysteinase (AHRD V1 ***- B9GFJ3_POPTR); contains Interpro domain(s) IPR000043 S-adenosyl-L-homocysteine hydrolase	GO:0044437//vacuolar part;GO:0005773//vacuole;GO:0005622//intracellular;GO:0005911//cell-cell junction;GO:0005623//cell;GO:0044422//organelle part;GO:0044424//intracellular part;GO:0043231//intracellular membrane-bounded organelle;GO:0043229//intracellular organelle;GO:0043227//membrane-bounded organelle;GO:0044464//cell part;GO:0016020//membrane;GO:0044446//intracellular organelle part;GO:003005…	GO:0046914//transition metal ion binding;GO:0016802//trialkylsulfonium hydrolase activity;GO:0043169//cation binding;GO:0003824//catalytic activity;GO:0016787//hydrolase activity;GO:0005488//binding;GO:0046872//metal ion binding;GO:0016801//hydrolase activity, acting on ether bonds;GO:0043167//ion binding	GO:2000112//regulation of cellular macromolecule biosynthetic process;GO:0010558//negative regulation of macromolecule biosynthetic process;GO:0031324//negative regulation of cellular metabolic process;GO:0016458//gene silencing;GO:0019219//regulation of nucleobase-containing compound metabolic process;GO:0051171//regulation of nitrogen compound metabolic process;GO:1903506//regulation of nucleic…	Metabolism	Amino acid metabolism	ko00270//Cysteine and methionine metabolism
	NewGene_004183	0.0451806	2.57	6.48	1.33423	Up	-	-	-	-	-	-	-
	Cla021576	0.0304849	1.2	2.94	1.29278	Up	CBL-interacting protein kinase 20 (AHRD V1 **** C4P7W9_VITVI); contains Interpro domain(s) IPR016024 Armadillo-type fold	-	GO:1901363//heterocyclic compound binding;GO:0097159//organic cyclic compound binding;GO:0016740//transferase activity;GO:0004674//protein serine/threonine kinase activity;GO:0016773//phosphotransferase activity, alcohol group as acceptor;GO:0016772//transferase activity, transferring phosphorus-containing groups;GO:0003824//catalytic activity;GO:0004672//protein kinase activity;GO:0005488//bindi…	GO:0006793//phosphorus metabolic process;GO:0044237//cellular metabolic process;GO:0050896//response to stimulus;GO:0008152//metabolic process;GO:0006796//phosphate-containing compound metabolic process;GO:0009987//cellular process	-	-	-
	Cla020675	0.0266986	1.43	3.48	1.28307	Up	Alpha-amylase (AHRD V1 ***- Q7X9T1_PHAAN); contains Interpro domain(s) IPR013775 Alpha-amylase, plant	-	GO:0005488//binding;GO:0043167//ion binding;GO:0043169//cation binding;GO:0004553//hydrolase activity, hydrolyzing O-glycosyl compounds;GO:0016787//hydrolase activity;GO:0016160//amylase activity;GO:0003824//catalytic activity;GO:0016798//hydrolase activity, acting on glycosyl bonds;GO:0046872//metal ion binding	GO:0044238//primary metabolic process;GO:0001101//response to acid chemical;GO:0008152//metabolic process;GO:0050896//response to stimulus;GO:0042221//response to chemical	Metabolism	Carbohydrate metabolism	ko00500//Starch and sucrose metabolism
	Cla023374	0.000600042	8	19.41	1.27873	Up	Squamosa promoter binding-like protein (AHRD V1 ***- Q52UU1_BETPL); contains Interpro domain(s) IPR017238 Squamosa promoter-binding protein	GO:0044464//cell part;GO:0043231//intracellular membrane-bounded organelle;GO:0005622//intracellular;GO:0044424//intracellular part;GO:0005623//cell;GO:0043226//organelle;GO:0043227//membrane-bounded organelle;GO:0043229//intracellular organelle	GO:0005488//binding;GO:0003676//nucleic acid binding;GO:0097159//organic cyclic compound binding;GO:1901363//heterocyclic compound binding	GO:0090567//reproductive shoot system development;GO:0044767//single-organism developmental process;GO:0022414//reproductive process;GO:0048856//anatomical structure development;GO:0048367//shoot system development;GO:0048731//system development;GO:0044702//single organism reproductive process;GO:0032502//developmental process;GO:0032501//multicellular organismal process;GO:0044707//single-multic…	-	-	-
	Cla009076	0.0136863	5.59	13.51	1.27311	Up	Unknown Protein (AHRD V1)	-	-	-	-	-	-
	Cla000391	0.000179703	2.88	6.94	1.26887	Up	Ureide permease 2 (AHRD V1 ***- B6U6B9_MAIZE); contains Interpro domain(s) IPR009834 Fatty acid elongase 3-ketoacyl-CoA synthase 1	-	-	-	-	-	-
	Cla014465	0.0136863	0.82	1.96	1.25716	Up	Homeobox-leucine zipper protein ATHB-15 (AHRD V1 ***- ATB15_ARATH); contains Interpro domain(s) IPR002913 Lipid-binding START	GO:0044464//cell part;GO:0005623//cell;GO:0043231//intracellular membrane-bounded organelle;GO:0043227//membrane-bounded organelle;GO:0044424//intracellular part;GO:0043229//intracellular organelle;GO:0043226//organelle;GO:0005622//intracellular	GO:0003676//nucleic acid binding;GO:1901363//heterocyclic compound binding;GO:0001071//nucleic acid binding transcription factor activity;GO:0005488//binding;GO:0003677//DNA binding;GO:0097159//organic cyclic compound binding	GO:0007275//multicellular organismal development;GO:0048856//anatomical structure development;GO:0032989//cellular component morphogenesis;GO:0006139//nucleobase-containing compound metabolic process;GO:0019438//aromatic compound biosynthetic process;GO:0000902//cell morphogenesis;GO:0044237//cellular metabolic process;GO:0044702//single organism reproductive process;GO:0090304//nucleic acid meta…	-	-	-
	Cla017268	0.0118462	2.29	5.46	1.25355	Up	Os04g0689500 protein (Fragment) (AHRD V1 *-*- Q0J8S7_ORYSJ)	-	-	-	-	-	-
	Cla019802	0.0137276	12.24	29.09	1.24892	Up	Pathogenesis-related protein 4B (Fragment) (AHRD V1 **-- Q6LBM4_TOBAC); contains Interpro domain(s) IPR001153 Barwin	GO:0071944//cell periphery;GO:0030312//external encapsulating structure;GO:0044464//cell part;GO:0005623//cell	-	GO:0050896//response to stimulus;GO:0009617//response to bacterium;GO:0009605//response to external stimulus;GO:0009620//response to fungus;GO:0006950//response to stress;GO:0051707//response to other organism;GO:0009607//response to biotic stimulus;GO:0043207//response to external biotic stimulus;GO:0051704//multi-organism process	-	-	-
	Cla018942	0.0303697	4.04	9.29	1.20132	Up	Glutathione S-transferase (AHRD V1 ***- Q84T17_PHAAT); contains Interpro domain(s) IPR017933 Glutathione S-transferase/chloride channel, C-terminal	-	-	-	Metabolism	Metabolism of other amino acids	ko00480//Glutathione metabolism
	Cla006986	0.0399963	1.51	3.47	1.20039	Up	Alpha-1 6 mannosyltransferase (AHRD V1 *--- F0U5R7_AJEC8); contains Interpro domain(s) IPR005599 Alg9-like mannosyltransferase	-	GO:0003824//catalytic activity;GO:0016740//transferase activity	GO:0071704//organic substance metabolic process;GO:0008152//metabolic process;GO:0044238//primary metabolic process	Metabolism	Glycan biosynthesis and metabolism	ko00510//N-Glycan biosynthesis
	Cla006802	2.75073e-05	5.49	12.55	1.19281	Up	Growth-regulating factor 5 (AHRD V1 ***- Q6AWY4_ORYSJ); contains Interpro domain(s) IPR014977 WRC	GO:0043229//intracellular organelle;GO:0043231//intracellular membrane-bounded organelle;GO:0005623//cell;GO:0005622//intracellular;GO:0043227//membrane-bounded organelle;GO:0043226//organelle;GO:0044424//intracellular part;GO:0044464//cell part	GO:1901363//heterocyclic compound binding;GO:0032550//purine ribonucleoside binding;GO:0003824//catalytic activity;GO:0097159//organic cyclic compound binding;GO:0036094//small molecule binding;GO:0001883//purine nucleoside binding;GO:0005488//binding;GO:0016787//hydrolase activity;GO:0097367//carbohydrate derivative binding;GO:0016817//hydrolase activity, acting on acid anhydrides;GO:0032549//ri…	GO:0046483//heterocycle metabolic process;GO:0090304//nucleic acid metabolic process;GO:0044271//cellular nitrogen compound biosynthetic process;GO:0019438//aromatic compound biosynthetic process;GO:0009058//biosynthetic process;GO:0043170//macromolecule metabolic process;GO:0006807//nitrogen compound metabolic process;GO:0006351//transcription, DNA-templated;GO:0034654//nucleobase-containing com…	-	-	-
	Cla002724	1.52917e-05	9.26	20.93	1.17649	Up	Unknown Protein (AHRD V1)	-	-	-	-	-	-
	Cla012431	0.00253286	0.58	1.31	1.17544	Up	TIR-NBS-LRR disease resistance-like protein (AHRD V1 *--- Q1KT01_POPTR); contains Interpro domain(s) IPR002182 NB-ARC	-	GO:0032550//purine ribonucleoside binding;GO:0016817//hydrolase activity, acting on acid anhydrides;GO:1901363//heterocyclic compound binding;GO:0016818//hydrolase activity, acting on acid anhydrides, in phosphorus-containing anhydrides;GO:0003824//catalytic activity;GO:0032549//ribonucleoside binding;GO:0016462//pyrophosphatase activity;GO:0036094//small molecule binding;GO:0016787//hydrolase ac…	GO:0050896//response to stimulus;GO:0044763//single-organism cellular process;GO:0006950//response to stress;GO:0009987//cellular process;GO:0044699//single-organism process;GO:0007154//cell communication	-	-	-
	NewGene_002013	0.00291401	5.52	12.45	1.17341	Up	BnaCnng70620D [Brassica napus]	-	-	-	-	-	-
	Cla019083	0.000454535	2.17	4.88	1.16919	Up	Pentatricopeptide repeat-containing protein (AHRD V1 ***- D7LQC4_ARALL); contains Interpro domain(s) IPR002885 Pentatricopeptide repeat	-	-	-	-	-	-
	Cla007250	1.64734e-07	14.99	33.6	1.16446	Up	Abscisic acid receptor PYR1 (AHRD V1 **-- F2YHU9_FRAAN); contains Interpro domain(s) IPR019587 Polyketide cyclase/dehydrase	-	GO:0019840//isoprenoid binding;GO:0005488//binding;GO:0008289//lipid binding	-	Environmental Information Processing	Signal transduction	ko04075//Plant hormone signal transduction
	Cla020378	0.03418	2.15	4.8	1.1587	Up	Acetyl esterase (AHRD V1 **-- AES_SHIF8); contains Interpro domain(s) IPR013094 Alpha/beta hydrolase fold-3	-	-	-	-	-	-
	Cla016301	0.00107771	11.67	25.99	1.15515	Up	Protein grpE 1 (AHRD V1 ***- A5E8J1_BRASB); contains Interpro domain(s) IPR000740 GrpE nucleotide exchange factor	-	-	-	-	-	-
	Cla022610	0.0175243	1.46	3.23	1.14557	Up	Cytochrome P450 (AHRD V1 ***- A9ZT57_COPJA); contains Interpro domain(s) IPR001128 Cytochrome P450	-	-	-	Metabolism	Biosynthesis of other secondary metabolites;Metabolism of terpenoids and polyketides	ko00945//Stilbenoid, diarylheptanoid and gingerol biosynthesis;ko00903//Limonene and pinene degradation
	Cla007926	0.04372	7.61	16.8	1.14249	Up	Unknown Protein (AHRD V1)	-	-	-	-	-	-
	Cla008231	0.0484721	17.57	38.47	1.13062	Up	Novel (Rab5-interacting protein domain containing) protein orthologous to c20orf24 (Human) (AHRD V1 ***- Q5BJ57_XENTR); contains Interpro domain(s) IPR010742 Rab5-interacting	-	-	-	-	-	-
	Cla008424	9.43976e-34	435.38	951.05	1.12725	Up	Cysteine proteinase inhibitor 5 (AHRD V1 ***- CYT5_ARATH); contains Interpro domain(s) IPR002885 Pentatricopeptide repeat	-	-	-	-	-	-
	Cla018477	0.00138282	16.75	36.58	1.12689	Up	Unknown Protein (AHRD V1)	-	-	-	-	-	-
	Cla012713	0.0484721	15.4	33.63	1.12682	Up	Unknown Protein (AHRD V1)	-	-	-	-	-	-
	Cla003647	0.0224325	3.71	8.1	1.1265	Up	Ethylene responsive transcription factor 1a (AHRD V1 **** D1MWZ3_CITLA); contains Interpro domain(s) IPR001471 Pathogenesis-related transcriptional factor and ERF, DNA-binding	-	-	-	-	-	-
	Cla016187	0.0224325	3.78	8.25	1.12601	Up	Ramosa1 C2H2 zinc-finger transcription factor (AHRD V1 *--- D0UTY6_ZEAMM); contains Interpro domain(s) IPR007087 Zinc finger, C2H2-type	-	-	-	-	-	-
	Cla002075	0.0145041	14.6	31.85	1.12533	Up	Glutaredoxin (AHRD V1 ***- B9HGW6_POPTR); contains Interpro domain(s) IPR011905 Glutaredoxin-like, plant II	-	-	GO:0050896//response to stimulus;GO:0065007//biological regulation;GO:0050794//regulation of cellular process;GO:0044699//single-organism process;GO:0001101//response to acid chemical;GO:0010033//response to organic substance;GO:0042221//response to chemical;GO:0044763//single-organism cellular process;GO:0009987//cellular process;GO:0050789//regulation of biological process	-	-	-
	Cla021592	0.0170902	2.56	5.58	1.12412	Up	Heat stress transcription factor A3 (AHRD V1 *-*- D1M7W9_SOLLC); contains Interpro domain(s) IPR000232 Heat shock factor (HSF)-type, DNA-binding	GO:0043227//membrane-bounded organelle;GO:0043226//organelle;GO:0005623//cell;GO:0044424//intracellular part;GO:0005622//intracellular;GO:0043229//intracellular organelle;GO:0043231//intracellular membrane-bounded organelle;GO:0044464//cell part	GO:0097159//organic cyclic compound binding;GO:1901363//heterocyclic compound binding;GO:0003677//DNA binding;GO:0001071//nucleic acid binding transcription factor activity;GO:0003676//nucleic acid binding;GO:0005488//binding	GO:0044249//cellular biosynthetic process;GO:0046483//heterocycle metabolic process;GO:0090304//nucleic acid metabolic process;GO:0010467//gene expression;GO:0071704//organic substance metabolic process;GO:0006139//nucleobase-containing compound metabolic process;GO:0019222//regulation of metabolic process;GO:0034654//nucleobase-containing compound biosynthetic process;GO:0006807//nitrogen compou…	-	-	-
	NewGene_018847	0.001837	3.29	7.06	1.10158	Up	PREDICTED: protein SULFUR DEFICIENCY-INDUCED 1 [Cucumis sativus]	-	GO:0003824//catalytic activity;GO:0016740//transferase activity	GO:0050789//regulation of biological process;GO:0065007//biological regulation	-	-	-
	Cla012722	0.0484721	3.89	8.32	1.09681	Up	Delta 9 acyl-lipid desaturase (AHRD V1 **** Q704E9_9NOSO); contains Interpro domain(s) IPR005804 Fatty acid desaturase, type 1	-	GO:0003824//catalytic activity;GO:0016491//oxidoreductase activity	GO:0044699//single-organism process;GO:0044710//single-organism metabolic process;GO:0008152//metabolic process	Metabolism	Global and Overview;Lipid metabolism	ko01212//Fatty acid metabolism;ko01040//Biosynthesis of unsaturated fatty acids
	Cla012853	0.00603804	17.45	37.1	1.08819	Up	Tobamovirus multiplication 1 (Fragment) (AHRD V1 ***- F5B5X6_CAPAN); contains Interpro domain(s) IPR009457 Protein of unknown function DUF1084	-	-	-	-	-	-
	Cla019157	0.0241855	5.29	11.15	1.0757	Up	Response regulator 6 (AHRD V1 ***- Q0WSS6_ARATH); contains Interpro domain(s) IPR001789 Signal transduction response regulator, receiver region	-	-	-	Environmental Information Processing	Signal transduction	ko04075//Plant hormone signal transduction
	Cla014358	2.9725e-29	21.23	44.74	1.07546	Up	MLO-like protein 3 (AHRD V1 ***- C6EWE6_VITVI); contains Interpro domain(s) IPR004326 Mlo-related protein	GO:0044464//cell part;GO:0044424//intracellular part;GO:0044425//membrane part;GO:0005622//intracellular;GO:0031224//intrinsic component of membrane;GO:0016020//membrane;GO:0005623//cell	GO:0005488//binding;GO:0005515//protein binding	GO:0022414//reproductive process;GO:0050896//response to stimulus;GO:0009856//pollination;GO:0006950//response to stress;GO:0044703//multi-organism reproductive process;GO:0051704//multi-organism process;GO:0032501//multicellular organismal process;GO:0044706//multi-multicellular organism process	-	-	-
	Cla013204	0.0209968	2.07	4.35	1.07138	Up	U-box domain-containing protein (AHRD V1 ***- D7MID4_ARALL); contains Interpro domain(s) IPR003613 U box domain	-	-	-	-	-	-
	Cla015894	0.000218631	12.62	26.42	1.06592	Up	Zinc finger protein CONSTANS-LIKE 3 (AHRD V1 *--- COL3_ARATH); contains Interpro domain(s) IPR000315 Zinc finger, B-box	-	-	GO:0009628//response to abiotic stimulus;GO:0050896//response to stimulus	-	-	-
	NewGene_001082	0.0319073	2.32	4.84	1.06088	Up	PREDICTED: F-box protein At5g07610-like [Fragaria vesca subsp. vesca]	-	-	-	-	-	-
	Cla008563	8.23613e-06	4.77	9.9	1.05344	Up	Hexokinase (AHRD V1 ***- E5GBT4_CUCME); contains Interpro domain(s) IPR001312 Hexokinase	GO:0031300//intrinsic component of organelle membrane;GO:0098588//bounding membrane of organelle;GO:0031975//envelope;GO:0005741//mitochondrial outer membrane;GO:0031090//organelle membrane;GO:0043231//intracellular membrane-bounded organelle;GO:0031967//organelle envelope;GO:0005623//cell;GO:0031306//intrinsic component of mitochondrial outer membrane;GO:0044429//mitochondrial part;GO:0031224//i…	GO:0032549//ribonucleoside binding;GO:0097159//organic cyclic compound binding;GO:0097367//carbohydrate derivative binding;GO:0032550//purine ribonucleoside binding;GO:1901363//heterocyclic compound binding;GO:0001883//purine nucleoside binding;GO:0016773//phosphotransferase activity, alcohol group as acceptor;GO:0003824//catalytic activity;GO:0001882//nucleoside binding;GO:0016740//transferase a…	GO:0006950//response to stress;GO:0044237//cellular metabolic process;GO:0032502//developmental process;GO:0044238//primary metabolic process;GO:0044767//single-organism developmental process;GO:0006091//generation of precursor metabolites and energy;GO:0048869//cellular developmental process;GO:0016310//phosphorylation;GO:0008152//metabolic process;GO:0050896//response to stimulus;GO:0009628//re…	Metabolism	Global and Overview;Carbohydrate metabolism	ko00500//Starch and sucrose metabolism;ko01200//Carbon metabolism;ko00520//Amino sugar and nucleotide sugar metabolism;ko00010//Glycolysis / Gluconeogenesis;ko00052//Galactose metabolism;ko00051//Fructose and mannose metabolism
	Cla009305	0.0387122	21.57	44.74	1.05254	Up	Rapid alkalinization factor (AHRD V1 **-- A7LIT1_LITCN); contains Interpro domain(s) IPR008801 Rapid ALkalinization Factor	GO:0044464//cell part;GO:0030054//cell junction;GO:0005618//cell wall;GO:0005623//cell;GO:0005911//cell-cell junction;GO:0030312//external encapsulating structure;GO:0071944//cell periphery	-	GO:0050896//response to stimulus;GO:0010033//response to organic substance;GO:0040007//growth;GO:0009725//response to hormone;GO:0009719//response to endogenous stimulus;GO:0042221//response to chemical	-	-	-
	Cla006599	0.0266413	4.67	9.65	1.04711	Up	Transcription factor MYC2 (AHRD V1 *--- RAP1_ARATH); contains Interpro domain(s) IPR001092 Basic helix-loop-helix dimerisation region bHLH	-	-	-	-	-	-
	Cla013183	1.9825e-33	240.72	494.77	1.0394	Up	Major latex-like protein 1 (AHRD V1 **-- Q5ZF57_PLAMJ); contains Interpro domain(s) IPR000916 Bet v I allergen	-	-	-	-	-	-
	NewGene_018250	0.00114618	3.08	6.29	1.03013	Up	-	-	-	-	-	-	-
	Cla021645	0.0139909	2.81	5.73	1.02797	Up	Unknown Protein (AHRD V1)	-	-	-	-	-	-
	Cla014120	5.10595e-12	56.86	115.74	1.0254	Up	Unknown Protein (AHRD V1)	-	-	-	-	-	-
	Cla022102	0.02549	3.63	7.38	1.02365	Up	Os06g0220000 protein (Fragment) (AHRD V1 ***- Q0DDJ2_ORYSJ); contains Interpro domain(s) IPR006766 Phosphate-induced protein 1 conserved region	GO:0005623//cell;GO:0044464//cell part	-	-	-	-	-
	Cla018816	1.67584e-23	75.99	154.45	1.02326	Up	Xyloglucan endotransglucosylase/hydrolase (AHRD V1 ***- C0SSE3_ROSHC); contains Interpro domain(s) IPR000757 Glycoside hydrolase, family 16	-	-	-	-	-	-
	Cla009352	0.0318968	13.31	27.01	1.02098	Up	Histidine-containing phosphotransfer protein (AHRD V1 ***- Q94KS0_CATRO); contains Interpro domain(s) IPR008207 Signal transduction histidine kinase, phosphotransfer (Hpt) region	-	GO:0060089//molecular transducer activity;GO:0016627//oxidoreductase activity, acting on the CH-CH group of donors;GO:0019899//enzyme binding;GO:0005515//protein binding;GO:0004871//signal transducer activity;GO:0019900//kinase binding;GO:0003824//catalytic activity;GO:0016491//oxidoreductase activity;GO:0005488//binding;GO:0019901//protein kinase binding;GO:0016628//oxidoreductase activity, acti…	GO:0006796//phosphate-containing compound metabolic process;GO:0023051//regulation of signaling;GO:0044237//cellular metabolic process;GO:0040007//growth;GO:0009987//cellular process;GO:0050789//regulation of biological process;GO:0044699//single-organism process;GO:0008152//metabolic process;GO:0044707//single-multicellular organism process;GO:0065007//biological regulation;GO:0050794//regulatio…	Environmental Information Processing	Signal transduction	ko04075//Plant hormone signal transduction
	Cla018558	1.45674e-54	103.96	209.54	1.0112	Up	Ninja-family protein 2 (AHRD V1 *-*- NNJA2_WHEAT); contains Interpro domain(s) IPR012463 Protein of unknown function DUF1675	-	-	-	-	-	-
	Cla021040	7.47729e-05	2.62	5.28	1.01097	Up	Os03g0643100 protein (Fragment) (AHRD V1 *-*- Q0DQ23_ORYSJ)	-	-	-	-	-	-
	Cla006332	0.0146585	10.23	20.56	1.00703	Up	Phycoerythrobilin ferredoxin oxidoreductase (AHRD V1 ***- Q6E5A3_MAIZE); contains Interpro domain(s) IPR009249 Ferredoxin-dependent bilin reductase	-	GO:0016627//oxidoreductase activity, acting on the CH-CH group of donors;GO:0046914//transition metal ion binding;GO:0016491//oxidoreductase activity;GO:0043169//cation binding;GO:0016636//oxidoreductase activity, acting on the CH-CH group of donors, iron-sulfur protein as acceptor;GO:0046872//metal ion binding;GO:0003824//catalytic activity;GO:0005488//binding;GO:0043167//ion binding	GO:0044763//single-organism cellular process;GO:0023052//signaling;GO:0034641//cellular nitrogen compound metabolic process;GO:0071704//organic substance metabolic process;GO:1901362//organic cyclic compound biosynthetic process;GO:0044699//single-organism process;GO:0009058//biosynthetic process;GO:0007154//cell communication;GO:0050789//regulation of biological process;GO:0044237//cellular meta…	Metabolism	Metabolism of cofactors and vitamins	ko00860//Porphyrin and chlorophyll metabolism
	NewGene_004745	3.61382e-06	5.4	10.81	1.00134	Up	-	-	-	-	-	-	-
	Cla006513	0.0266413	11.62	5.8	-1.00249	Down	Unknown Protein (AHRD V1)	-	-	-	-	-	-
	Cla006021	0.000733538	31.86	15.74	-1.01731	Down	Auxin responsive protein (AHRD V1 ***- D9IQE6_CATRO); contains Interpro domain(s) IPR003311 AUX/IAA protein	-	-	GO:0009987//cellular process	Environmental Information Processing	Signal transduction	ko04075//Plant hormone signal transduction
	Cla016471	0.00905081	4.58	2.26	-1.01902	Down	Tryptophan synthase beta chain (AHRD V1 **** Q9FFW8_ARATH); contains Interpro domain(s) IPR006316 Tryptophan synthase, beta chain-like	-	-	-	Metabolism	Amino acid metabolism;Global and Overview	ko01230//Biosynthesis of amino acids;ko00260//Glycine, serine and threonine metabolism;ko00400//Phenylalanine, tyrosine and tryptophan biosynthesis
	Cla015298	0.00957084	4.31	2.12	-1.02362	Down	4-Coumarate CoA ligase (AHRD V1 ***- B2Z6P0_POPTR); contains Interpro domain(s) IPR000873 AMP-dependent synthetase and ligase	-	GO:0016405//CoA-ligase activity;GO:0016877//ligase activity, forming carbon-sulfur bonds;GO:0003824//catalytic activity;GO:0016874//ligase activity	-	Metabolism	Metabolism of cofactors and vitamins;Amino acid metabolism;Biosynthesis of other secondary metabolites	ko00940//Phenylpropanoid biosynthesis;ko00360//Phenylalanine metabolism;ko00130//Ubiquinone and other terpenoid-quinone biosynthesis
	Cla012571	0.0464171	8.73	4.29	-1.025	Down	Cytochrome P450 (AHRD V1 ***- Q42959_TOBAC); contains Interpro domain(s) IPR001128 Cytochrome P450	-	GO:0046914//transition metal ion binding;GO:0016491//oxidoreductase activity;GO:0005488//binding;GO:0003824//catalytic activity;GO:1901363//heterocyclic compound binding;GO:0046872//metal ion binding;GO:0043169//cation binding;GO:0046906//tetrapyrrole binding;GO:0097159//organic cyclic compound binding;GO:0043167//ion binding	GO:0008152//metabolic process;GO:0044710//single-organism metabolic process;GO:0044699//single-organism process	-	-	-
	Cla016474	0.0353135	3.44	1.69	-1.02539	Down	Proline dehydrogenase (AHRD V1 ***- Q6RUF9_SOYBN); contains Interpro domain(s) IPR015659 Proline oxidase	-	-	-	Metabolism	Amino acid metabolism	ko00330//Arginine and proline metabolism
	Cla013274	0.040528	2.29	1.12	-1.03185	Down	Respiratory burst oxidase-like protein J (AHRD V1 ***- B2D0P0_HORVD); contains Interpro domain(s) IPR013112 FAD-binding 8	-	GO:0016491//oxidoreductase activity;GO:0003824//catalytic activity	-	-	-	-
	Cla001930	0.0217704	25.25	12.21	-1.04822	Down	Major latex-like protein (AHRD V1 **-- Q9AXU0_PRUPE); contains Interpro domain(s) IPR000916 Bet v I allergen	-	-	-	-	-	-
	Cla014403	1.1285e-10	140.45	67.61	-1.05475	Down	Unknown Protein (AHRD V1)	-	-	-	-	-	-
	Cla009511	0.0195619	69.71	33.49	-1.05764	Down	Ycf20-like protein (AHRD V1 ***- YC20L_ARATH); contains Interpro domain(s) IPR007572 Protein of unknown function DUF565	GO:0043226//organelle;GO:0044464//cell part;GO:0005622//intracellular;GO:0043231//intracellular membrane-bounded organelle;GO:0043227//membrane-bounded organelle;GO:0005737//cytoplasm;GO:0005623//cell;GO:0044424//intracellular part;GO:0044444//cytoplasmic part;GO:0009536//plastid;GO:0043229//intracellular organelle	-	GO:0009314//response to radiation;GO:0009628//response to abiotic stimulus;GO:0050896//response to stimulus;GO:1990066//energy quenching;GO:0009416//response to light stimulus	-	-	-
	NewGene_008215	0.0017344	3.24	1.54	-1.07306	Down	MuDR family transposase isoform 2 [Theobroma cacao]	-	GO:0005488//binding;GO:0046872//metal ion binding;GO:0046914//transition metal ion binding;GO:0043167//ion binding;GO:0043169//cation binding;GO:0097159//organic cyclic compound binding	-	-	-	-
	Cla020701	0.0115448	11.14	5.16	-1.11031	Down	Plant-specific domain TIGR01570 family protein (AHRD V1 ***- B6U390_MAIZE); contains Interpro domain(s) IPR006460 Protein of unknown function DUF617, plant	-	-	-	-	-	-
	Cla004970	0.0450235	12.12	5.53	-1.13204	Down	Ring finger protein (AHRD V1 *-*- O49869_HORVU); contains Interpro domain(s) IPR018957 Zinc finger, C3HC4 RING-type	-	-	-	-	-	-
	Cla014752	0.023007	3.53	1.56	-1.17812	Down	Xylanase inhibitor (Fragment) (AHRD V1 **-- Q53IQ4_WHEAT); contains Interpro domain(s) IPR001461 Peptidase A1	GO:0044464//cell part;GO:0005623//cell	-	-	-	-	-
	Cla017867	0.000215779	4.34	1.84	-1.23799	Down	Exocyst complex component 7 (AHRD V1 **** Q9SF51_ARATH); contains Interpro domain(s) IPR004140 Exo70 exocyst complex subunit	-	-	-	-	-	-
	Cla020967	0.0204781	7.48	3.16	-1.24311	Down	SPX domain-containing protein 3 (AHRD V1 ***- E5D6S7_PHAVU); contains Interpro domain(s) IPR004331 SPX, N-terminal	-	-	GO:0071496//cellular response to external stimulus;GO:0031667//response to nutrient levels;GO:0051716//cellular response to stimulus;GO:0033554//cellular response to stress;GO:0009991//response to extracellular stimulus;GO:0031669//cellular response to nutrient levels;GO:0050896//response to stimulus;GO:0042594//response to starvation;GO:0007154//cell communication;GO:0009987//cellular process;GO…	-	-	-
	Cla005068	0.0178399	2.52	1.06	-1.24936	Down	FAD-binding domain-containing protein (AHRD V1 **-- D7MMH3_ARALL); contains Interpro domain(s) IPR006094 FAD linked oxidase, N-terminal	-	GO:0003824//catalytic activity;GO:0016614//oxidoreductase activity, acting on CH-OH group of donors;GO:0016491//oxidoreductase activity	-	-	-	-
	Cla022362	0.0136863	5.83	2.38	-1.29253	Down	WRKY transcription factor 3 (AHRD V1 **** E7BTN0_VITVI); contains Interpro domain(s) IPR003657 DNA-binding WRKY	-	-	-	-	-	-
	Cla013371	5.03295e-08	8.53	3.45	-1.30595	Down	Asparagine synthetase (AHRD V1 **** F6KDH5_MORAL); contains Interpro domain(s) IPR006426 Asparagine synthase, glutamine-hydrolyzing	-	-	-	Metabolism	Amino acid metabolism	ko00250//Alanine, aspartate and glutamate metabolism
	Cla015684	0.0451806	42.87	16.62	-1.36705	Down	Membrane protein (AHRD V1 ***- B9CRE5_STACP); contains Interpro domain(s) IPR006696 Protein of unknown function DUF423	-	-	-	-	-	-
	Cla022226	0.00727552	3.58	1.33	-1.42853	Down	Flavin monooxygenase-like protein (AHRD V1 ***- D2IGV1_SOLLC); contains Interpro domain(s) IPR002938 Monooxygenase, FAD-binding	-	-	-	Metabolism	Amino acid metabolism	ko00380//Tryptophan metabolism
	Cla001586	0.00385769	18.28	6.59	-1.47192	Down	Rac-like GTP binding protein (AHRD V1 **-* Q9XER7_9BRYO); contains Interpro domain(s) IPR003578 Ras small GTPase, Rho type	GO:0070013//intracellular organelle lumen;GO:0043232//intracellular non-membrane-bounded organelle;GO:0005623//cell;GO:0043226//organelle;GO:0044428//nuclear part;GO:0005622//intracellular;GO:0043233//organelle lumen;GO:0031981//nuclear lumen;GO:0044446//intracellular organelle part;GO:0044422//organelle part;GO:0043228//non-membrane-bounded organelle;GO:0016020//membrane;GO:0044424//intracellula…	GO:1901363//heterocyclic compound binding;GO:0036094//small molecule binding;GO:0032550//purine ribonucleoside binding;GO:0097159//organic cyclic compound binding;GO:0001882//nucleoside binding;GO:0097367//carbohydrate derivative binding;GO:0005488//binding;GO:0032549//ribonucleoside binding;GO:0001883//purine nucleoside binding	GO:0000904//cell morphogenesis involved in differentiation;GO:0010118//stomatal movement;GO:0009628//response to abiotic stimulus;GO:0048856//anatomical structure development;GO:0032502//developmental process;GO:0048869//cellular developmental process;GO:0044763//single-organism cellular process;GO:0050789//regulation of biological process;GO:0050794//regulation of cellular process;GO:0009314//re…	Cellular Processes	Transport and catabolism	ko04145//Phagosome
	Cla022332	0.00601522	10.65	3.81	-1.48299	Down	Auxin-responsive protein IAA8 (AHRD V1 ***- F4IKE9_ARATH); contains Interpro domain(s) IPR003311 AUX/IAA protein	-	-	-	Environmental Information Processing	Signal transduction	ko04075//Plant hormone signal transduction
	Cla010408	0.0383847	2.95	1.04	-1.50413	Down	Cinnamoyl CoA reductase-like protein (AHRD V1 ***- Q9LYJ0_ARATH); contains Interpro domain(s) IPR002225 3-beta hydroxysteroid dehydrogenase/isomerase	-	-	-	-	-	-
	Cla010019	1.31297e-20	20.68	7.28	-1.50623	Down	Cytochrome P450 (AHRD V1 ***- B9HLE3_POPTR); contains Interpro domain(s) IPR001128 Cytochrome P450	GO:0043227//membrane-bounded organelle;GO:0043231//intracellular membrane-bounded organelle;GO:0005623//cell;GO:0043229//intracellular organelle;GO:0005622//intracellular;GO:0043226//organelle;GO:0044464//cell part;GO:0044424//intracellular part	GO:0005488//binding;GO:0016705//oxidoreductase activity, acting on paired donors, with incorporation or reduction of molecular oxygen;GO:0043169//cation binding;GO:0016491//oxidoreductase activity;GO:0003824//catalytic activity;GO:0043167//ion binding;GO:0004497//monooxygenase activity;GO:0046872//metal ion binding	GO:0044550//secondary metabolite biosynthetic process;GO:0044249//cellular biosynthetic process;GO:1901360//organic cyclic compound metabolic process;GO:0009607//response to biotic stimulus;GO:0042430//indole-containing compound metabolic process;GO:0034641//cellular nitrogen compound metabolic process;GO:0009404//toxin metabolic process;GO:0051716//cellular response to stimulus;GO:0044711//singl…	-	-	-
	Cla017551	0.0231723	12.47	4	-1.64039	Down	Unknown Protein (AHRD V1)	-	-	-	-	-	-
	Cla016591	0.00050888	2.02	0.64	-1.65821	Down	Beta-galactosidase (AHRD V1 ***- F6I1A6_VITVI); contains Interpro domain(s) IPR001944 Glycoside hydrolase, family 35	-	-	-	-	-	-
	Cla000021	1.22677e-07	28.42	8.36	-1.76533	Down	Pseudouridine synthase family protein (AHRD V1 ***- D7L9Z2_ARALL); contains Interpro domain(s) IPR006145 Pseudouridine synthase, RsuA and RluB/C/D/E/F	-	GO:0016853//isomerase activity;GO:0005488//binding;GO:0003676//nucleic acid binding;GO:0003824//catalytic activity;GO:0016866//intramolecular transferase activity;GO:1901363//heterocyclic compound binding;GO:0097159//organic cyclic compound binding	GO:0009987//cellular process;GO:0008152//metabolic process;GO:0044238//primary metabolic process;GO:0090304//nucleic acid metabolic process;GO:0044237//cellular metabolic process;GO:0071704//organic substance metabolic process;GO:0043170//macromolecule metabolic process;GO:1901360//organic cyclic compound metabolic process;GO:0043412//macromolecule modification;GO:0006725//cellular aromatic compo…	-	-	-
	Cla019669	0.03418	7.49	2.15	-1.80063	Down	Light-dependent short hypocotyls 1 (AHRD V1 ***- D7M6V0_ARALL); contains Interpro domain(s) IPR006936 Protein of unknown function DUF640	-	-	-	-	-	-
	NewGene_011540	0.0145779	48.5	13.72	-1.8217	Down	PREDICTED: beta-glucosidase 12-like [Cucumis melo]	-	GO:0016787//hydrolase activity;GO:0016798//hydrolase activity, acting on glycosyl bonds;GO:0003824//catalytic activity	GO:0008152//metabolic process;GO:0044238//primary metabolic process	Metabolism	Metabolism of other amino acids;Biosynthesis of other secondary metabolites;Carbohydrate metabolism	ko00500//Starch and sucrose metabolism;ko00940//Phenylpropanoid biosynthesis;ko00460//Cyanoamino acid metabolism
	Cla010338	0.0156124	7.51	2.11	-1.83157	Down	DNA-binding protein-like (AHRD V1 **-- Q8L919_ARATH); contains Interpro domain(s) IPR011598 Helix-loop-helix DNA-binding	-	-	-	-	-	-
	Cla002922	0.00641689	2.57	0.68	-1.91816	Down	AP2-like ethylene-responsive transcription factor (AHRD V1 **** F4IL00_ARATH); contains Interpro domain(s) IPR001471 Pathogenesis-related transcriptional factor and ERF, DNA-binding	-	-	-	-	-	-
	NewGene_011319	6.35716e-05	10.06	2.6	-1.95205	Down	PREDICTED: squamosa promoter-binding-like protein 3 isoform X1 [Cucumis melo]	GO:0043229//intracellular organelle;GO:0043231//intracellular membrane-bounded organelle;GO:0044424//intracellular part;GO:0044464//cell part;GO:0005622//intracellular;GO:0043227//membrane-bounded organelle;GO:0043226//organelle;GO:0005623//cell	GO:0043167//ion binding;GO:0097159//organic cyclic compound binding;GO:0003676//nucleic acid binding;GO:0043169//cation binding;GO:1901363//heterocyclic compound binding;GO:0005488//binding	GO:0071704//organic substance metabolic process;GO:0048580//regulation of post-embryonic development;GO:0009909//regulation of flower development;GO:0009058//biosynthetic process;GO:0032502//developmental process;GO:0060255//regulation of macromolecule metabolic process;GO:2000241//regulation of reproductive process;GO:0048831//regulation of shoot system development;GO:0044237//cellular metabolic…	-	-	-
	Cla018800	0.000108199	11.62	2.71	-2.10025	Down	Pathogenesis-related protein PR-1 (AHRD V1 **-- B4FQY0_MAIZE); contains Interpro domain(s) IPR001283 Allergen V5/Tpx-1 related	-	-	-	-	-	-
	Cla020268	0.00338473	14.88	3.42	-2.12131	Down	Unknown Protein (AHRD V1); contains Interpro domain(s) IPR009688 Protein of unknown function DUF1279	GO:0043229//intracellular organelle;GO:0043231//intracellular membrane-bounded organelle;GO:0005623//cell;GO:0043226//organelle;GO:0044464//cell part;GO:0043227//membrane-bounded organelle;GO:0005622//intracellular;GO:0044424//intracellular part	-	-	-	-	-
	Cla008160	0.0260218	24.9	5.61	-2.15007	Down	Protein embryo defective 2735 (AHRD V1 ***- Q9FFZ3_ARATH)	-	-	-	-	-	-
	Cla022244	0.00781162	1.11	0.24	-2.20945	Down	Receptor-like protein kinase (AHRD V1 *-** O64398_SOLLC); contains Interpro domain(s) IPR002290 Serine/threonine protein kinase	-	-	-	-	-	-
	Cla021491	0.0050945	4.17	0.88	-2.24447	Down	Acid phosphatase-like protein (AHRD V1 **-* Q9SW12_ARATH); contains Interpro domain(s) IPR010028 Acid phosphatase, plant	GO:0071944//cell periphery;GO:0043229//intracellular organelle;GO:0043227//membrane-bounded organelle;GO:0044444//cytoplasmic part;GO:0044464//cell part;GO:0044446//intracellular organelle part;GO:0043226//organelle;GO:0043231//intracellular membrane-bounded organelle;GO:0044424//intracellular part;GO:0005911//cell-cell junction;GO:0005773//vacuole;GO:0044437//vacuolar part;GO:0005623//cell;GO:00…	GO:0016787//hydrolase activity;GO:0016791//phosphatase activity;GO:0003824//catalytic activity;GO:0016788//hydrolase activity, acting on ester bonds;GO:0042578//phosphoric ester hydrolase activity	GO:0009987//cellular process;GO:0006793//phosphorus metabolic process;GO:0006796//phosphate-containing compound metabolic process;GO:0008152//metabolic process;GO:0044237//cellular metabolic process	-	-	-
	Cla021837	0.0116983	6.86	1.35	-2.34525	Down	Unknown Protein (AHRD V1)	-	-	-	-	-	-
	Cla003785	0.00205342	10.62	1.81	-2.55272	Down	Integral membrane protein (AHRD V1 **-- A8JE84_CHLRE); contains Interpro domain(s) IPR007462 Protein of unknown function DUF502	GO:0043231//intracellular membrane-bounded organelle;GO:0043227//membrane-bounded organelle;GO:0044424//intracellular part;GO:0005623//cell;GO:0044464//cell part;GO:0005622//intracellular;GO:0043229//intracellular organelle;GO:0043226//organelle	-	-	-	-	-
	Cla020043	0.0240895	2.96	0.43	-2.78319	Down	FIP1 (AHRD V1 **-- B6U778_MAIZE); contains Interpro domain(s) IPR004182 GRAM	-	-	-	-	-	-
	Cla019900	0.00205342	1.33	0.19	-2.80735	Down	Lipoxygenase (AHRD V1 ***- Q42704_CUCSA); contains Interpro domain(s) IPR013819 Lipoxygenase, C-terminal IPR000907 Lipoxygenase	-	GO:0043167//ion binding;GO:0046914//transition metal ion binding;GO:0016702//oxidoreductase activity, acting on single donors with incorporation of molecular oxygen, incorporation of two atoms of oxygen;GO:0016491//oxidoreductase activity;GO:0051213//dioxygenase activity;GO:0016701//oxidoreductase activity, acting on single donors with incorporation of molecular oxygen;GO:0003824//catalytic activ…	GO:0044237//cellular metabolic process;GO:0019752//carboxylic acid metabolic process;GO:0008152//metabolic process;GO:0043436//oxoacid metabolic process;GO:0046394//carboxylic acid biosynthetic process;GO:0044699//single-organism process;GO:0044763//single-organism cellular process;GO:0044281//small molecule metabolic process;GO:0044711//single-organism biosynthetic process;GO:0044710//single-org…	Metabolism	Lipid metabolism	ko00591//Linoleic acid metabolism
	Cla004692	0.0155486	2.51	0.32	-2.97154	Down	Nodulin MtN21 family protein (AHRD V1 ***- D7LD58_ARALL); contains Interpro domain(s) IPR000620 Protein of unknown function DUF6, transmembrane	-	-	-	-	-	-
	Cla002144	0.000410676	19.89	2.47	-3.00946	Down	mRNA clone RTFL01-09-F11 (AHRD V1 *--- E4MWR8_THEHA); contains Interpro domain(s) IPR007650 Protein of unknown function DUF581	-	-	-	-	-	-
	Cla019815	0.031906	12.58	1.18	-3.41427	Down	Thioredoxin-like protein 1 (AHRD V1 ***- B6SHZ5_MAIZE); contains Interpro domain(s) IPR010400 Protein of unknown function DUF1000	-	GO:0003824//catalytic activity;GO:0015036//disulfide oxidoreductase activity;GO:0016667//oxidoreductase activity, acting on a sulfur group of donors;GO:0016491//oxidoreductase activity	GO:0042592//homeostatic process;GO:0044699//single-organism process;GO:0044763//single-organism cellular process;GO:0044281//small molecule metabolic process;GO:0019725//cellular homeostasis;GO:0008152//metabolic process;GO:0065007//biological regulation;GO:0065008//regulation of biological quality;GO:0009987//cellular process;GO:0018904//ether metabolic process;GO:0044710//single-organism metabo…	-	-	-
	NewGene_006748	0.031906	6.92	0.64	-3.43463	Down	PREDICTED: 29 kDa ribonucleoprotein, chloroplastic [Cucumis melo]	-	GO:0005488//binding;GO:0036094//small molecule binding;GO:0097159//organic cyclic compound binding	-	-	-	-
	Cla004807	0.000296722	2.47	0.22	-3.48894	Down	Beta-glucosidase G3 (AHRD V1 ***- A8TVQ9_MEDTR); contains Interpro domain(s) IPR001360 Glycoside hydrolase, family 1	-	GO:0016787//hydrolase activity;GO:0003824//catalytic activity;GO:0016798//hydrolase activity, acting on glycosyl bonds	GO:0008152//metabolic process	Metabolism	Carbohydrate metabolism;Biosynthesis of other secondary metabolites;Metabolism of other amino acids	ko00500//Starch and sucrose metabolism;ko00940//Phenylpropanoid biosynthesis;ko00460//Cyanoamino acid metabolism
	Cla004957	0.031906	0.46	0.04	-3.52356	Down	Protein DYAD (AHRD V1 **-- DYAD_ARATH)	-	-	-	-	-	-
	Cla006226	0.000852925	0.69	0.06	-3.52356	Down	Crinkler (CRN) family protein (AHRD V1 *-*- D0NJ10_PHYIT); contains Interpro domain(s) IPR011009 Protein kinase-like	-	-	-	-	-	-
	Cla013593	0.0199404	0.73	0.06	-3.60486	Down	NADH dehydrogenase (AHRD V1 ***- E5GBQ4_CUCME); contains Interpro domain(s) IPR013027 FAD-dependent pyridine nucleotide-disulphide oxidoreductase	-	-	-	-	-	-
	Cla005459	0.000170555	7.04	0.34	-4.37197	Down	Unknown Protein (AHRD V1); contains Interpro domain(s) IPR009606 Protein of unknown function DUF1218	-	-	-	-	-	-
	Cla012779	0.000221535	0.79	0.001	-9.62571	Down	Phenylalanine ammonia-lyase (AHRD V1 ***- B9S0K2_RICCO); contains Interpro domain(s) IPR005922 Phenylalanine ammonia-lyase	GO:0005737//cytoplasm;GO:0005622//intracellular;GO:0005623//cell;GO:0044424//intracellular part;GO:0044464//cell part;GO:0044444//cytoplasmic part	GO:0003824//catalytic activity;GO:0016841//ammonia-lyase activity;GO:0016840//carbon-nitrogen lyase activity;GO:0016829//lyase activity	GO:0009314//response to radiation;GO:0044550//secondary metabolite biosynthetic process;GO:0006807//nitrogen compound metabolic process;GO:0009058//biosynthetic process;GO:0006950//response to stress;GO:0044699//single-organism process;GO:0044710//single-organism metabolic process;GO:0044238//primary metabolic process;GO:0032787//monocarboxylic acid metabolic process;GO:0019438//aromatic compound…	Metabolism	Biosynthesis of other secondary metabolites;Amino acid metabolism	ko00940//Phenylpropanoid biosynthesis;ko00360//Phenylalanine metabolism
	Cla019901	0.0353135	1.48	0.001	-10.5314	Down	Lipoxygenase (AHRD V1 ***- Q42710_CUCSA); contains Interpro domain(s) IPR000907 Lipoxygenase	-	GO:0043167//ion binding;GO:0043169//cation binding;GO:0046914//transition metal ion binding;GO:0016491//oxidoreductase activity;GO:0005488//binding;GO:0051213//dioxygenase activity;GO:0046872//metal ion binding;GO:0016702//oxidoreductase activity, acting on single donors with incorporation of molecular oxygen, incorporation of two atoms of oxygen;GO:0003824//catalytic activity;GO:0016701//oxidore…	GO:0071704//organic substance metabolic process;GO:0046394//carboxylic acid biosynthetic process;GO:0044283//small molecule biosynthetic process;GO:0019752//carboxylic acid metabolic process;GO:0009987//cellular process;GO:0043436//oxoacid metabolic process;GO:0044255//cellular lipid metabolic process;GO:0008152//metabolic process;GO:0006629//lipid metabolic process;GO:0032787//monocarboxylic aci…	Metabolism	Lipid metabolism	ko00591//Linoleic acid metabolism
	NewGene_003097	0.0353135	2.35	0.001	-11.1984	Down	-	-	-	-	-	-	-
	Cla001205	3.78708e-16	4	0.001	-11.9658	Down	Photosystem I P700 chlorophyll a apoprotein A1 (AHRD V1 ***- E3W0J3_PRUPE); contains Interpro domain(s) IPR006243 Photosystem I psaA	GO:0043227//membrane-bounded organelle;GO:0044425//membrane part;GO:0009521//photosystem;GO:0044444//cytoplasmic part;GO:0044435//plastid part;GO:0044422//organelle part;GO:0034357//photosynthetic membrane;GO:0043234//protein complex;GO:0043231//intracellular membrane-bounded organelle;GO:0043229//intracellular organelle;GO:0005623//cell;GO:0009536//plastid;GO:0044446//intracellular organelle par…	GO:0097159//organic cyclic compound binding;GO:0003824//catalytic activity;GO:0043169//cation binding;GO:0046872//metal ion binding;GO:0043167//ion binding;GO:0046906//tetrapyrrole binding;GO:0005488//binding;GO:0051536//iron-sulfur cluster binding;GO:1901363//heterocyclic compound binding;GO:0051540//metal cluster binding	GO:0019538//protein metabolic process;GO:0044699//single-organism process;GO:0044237//cellular metabolic process;GO:0006464//cellular protein modification process;GO:0043170//macromolecule metabolic process;GO:0044710//single-organism metabolic process;GO:0071704//organic substance metabolic process;GO:0043412//macromolecule modification;GO:0008152//metabolic process;GO:0036211//protein modificat…	Metabolism	Energy metabolism	ko00195//Photosynthesis
	Cla019006	0.0123478	4.42	0.001	-12.1098	Down	Calmodulin (AHRD V1 ***- B6SJJ2_MAIZE); contains Interpro domain(s) IPR011992 EF-Hand type	-	-	-	Organismal Systems	Environmental adaptation	ko04626//Plant-pathogen interaction
	Cla011323	1.59814e-26	4.85	0.001	-12.2438	Down	Wall-associated receptor kinase-like 22 (AHRD V1 *-** WAKLI_ARATH); contains Interpro domain(s) IPR002290 Serine/threonine protein kinase	-	GO:0016772//transferase activity, transferring phosphorus-containing groups;GO:0003824//catalytic activity;GO:0016740//transferase activity;GO:0016301//kinase activity	GO:0009987//cellular process;GO:0050896//response to stimulus;GO:0016310//phosphorylation;GO:0044267//cellular protein metabolic process;GO:0036211//protein modification process;GO:0006464//cellular protein modification process;GO:0006793//phosphorus metabolic process;GO:0044237//cellular metabolic process;GO:0071704//organic substance metabolic process;GO:0006796//phosphate-containing compound m…	-	-	-
	Cla000265	3.78404e-08	5.14	0.001	-12.3276	Down	Membrane transporter D1 (AHRD V1 **** GTR1_LEIDO); contains Interpro domain(s) IPR005828 General substrate transporter	GO:0031224//intrinsic component of membrane;GO:0044422//organelle part;GO:0043229//intracellular organelle;GO:0044464//cell part;GO:0043227//membrane-bounded organelle;GO:0044444//cytoplasmic part;GO:0044446//intracellular organelle part;GO:0044437//vacuolar part;GO:0044425//membrane part;GO:0016020//membrane;GO:0005623//cell;GO:0044424//intracellular part;GO:0043226//organelle;GO:0000325//plant-…	GO:0016491//oxidoreductase activity;GO:0016628//oxidoreductase activity, acting on the CH-CH group of donors, NAD or NADP as acceptor;GO:0005215//transporter activity;GO:0016627//oxidoreductase activity, acting on the CH-CH group of donors;GO:0022857//transmembrane transporter activity;GO:0003824//catalytic activity	GO:0051704//multi-organism process;GO:0009607//response to biotic stimulus;GO:0009987//cellular process;GO:1902578//single-organism localization;GO:0044710//single-organism metabolic process;GO:0051234//establishment of localization;GO:0044763//single-organism cellular process;GO:0051179//localization;GO:0006810//transport;GO:0050896//response to stimulus;GO:0051707//response to other organism;GO…	-	-	-
	NewGene_016295	0.0353135	9.13	0.001	-13.1564	Down	PREDICTED: (S)-tetrahydroprotoberberine N-methyltransferase-like isoform X2 [Cicer arietinum]	-	-	-	-	-	-
	Cla008923	0.00405354	11.1	0.001	-13.4383	Down	Protein-methionine-s-oxide reductase (AHRD V1 ***- D7L9H5_ARALL)	GO:0016020//membrane	GO:0016491//oxidoreductase activity;GO:0016671//oxidoreductase activity, acting on a sulfur group of donors, disulfide as acceptor;GO:0003824//catalytic activity;GO:0016667//oxidoreductase activity, acting on a sulfur group of donors	GO:0044699//single-organism process;GO:0044710//single-organism metabolic process;GO:0008152//metabolic process	-	-	-
	Cla012873	0.0353135	11.2	0.001	-13.4512	Down	UDP-glycosyltransferase (AHRD V1 ***- D7KLQ4_ARALL); contains Interpro domain(s) IPR002213 UDP-glucuronosyl/UDP-glucosyltransferase	-	-	-	-	-	-
	Cla020631	2.76796e-15	26.24	0.001	-14.6795	Down	Unknown Protein (AHRD V1)	-	-	-	-	-	-
